# Supplementary material for: Use of a Hybrid Adeno-Associated Viral Vector Transposon System to Deliver the Insulin Gene to Diabetic NOD Mice
Source: MDPI journal article supplement (doi:10.3390/cells9102227), 2020-10-02
Supplement: s1 [file s1]

**Table S2****Primer sequences for the detection of target transcripts by RT-PCR**

| <b>Genes</b>           | <b>Primers</b> | <b>Sequences 5'-3'</b>  |
|------------------------|----------------|-------------------------|
| Beta-actin             | Forward        | ATGGAGGGGAATACAGCCC     |
|                        | Reverse        | TTCTTTGCAGCTCCTTCGTT    |
| INS-FUR                | Forward        | CGCTTTCGTGAACCAGCAC     |
|                        | Reverse        | AGTTCCACCTGTCCGACCT     |
| <i>Pdx1</i>            | Forward        | CCAGTGGGCAGGAGGTGCTTACA |
|                        | Reverse        | CTCTGCATTCATGGCTTCAA    |
| <i>NeuroD1</i>         | Forward        | GCTCCAGGGTTATGAGATCG    |
|                        | Reverse        | CTCTGCATTCATGGCTTCAA    |
| Nkx.2.2                | Forward        | ACTTGAGCTCGAGTCTTGG     |
|                        | Reverse        | AGCCCTTTCTACGACAGCAG    |
| <i>Nkx6.1</i>          | Forward        | CCGAGTCCTGCTTCTTCTTG    |
|                        | Reverse        | TATTCTCTGGGGATGACGGA    |
| <i>MafA</i>            | Forward        | CTCTGGAGCTGGCACTTCTC    |
|                        | Reverse        | AGGAGGTCATCCGACTGAAA    |
| <i>Pax6</i>            | Forward        | CTTCATCCGAGTCTTCTCCG    |
|                        | Reverse        | AGTTGGTGTCTCTCCCCCT     |
| <i>P48</i>             | Forward        | GAAGGTTATCATCTGCCATCG   |
|                        | Reverse        | GGGTGGTTCGTTCTCTATGTT   |
| Mouse insulin 1        | Forward        | TGGCTTCTTCTACACACCCAAG  |
|                        | Reverse        | ACAATGCCACGCTTCTGC      |
| Mouse Insulin 2        | Forward        | GAGTCCCACCCCACCCAG      |
|                        | Reverse        | TCCACTTCACGGCGGGACA     |
| Pancreatic polypeptide | Forward        | GCATAGTCGCCTGGGTACAT    |
|                        | Reverse        | CCAACACTCACTAGCTCAGCA   |
| Somatostatin           | Forward        | GCTGCGCTCTGCATCGTCCT    |
|                        | Reverse        | GGCCAGTTCCTGTTTCCCGGT   |
| Glut 2                 | Forward        | TCTTCACGGCTGTCTCTGTGCT  |
|                        | Reverse        | AGCAGCACAAGTCCCACCGAC   |
