# Supplementary material for: Use of a Hybrid Adeno-Associated Viral Vector Transposon System to Deliver the Insulin Gene to Diabetic NOD Mice
Source: MDPI journal article supplement (doi:10.3390/cells9102227), 2020-10-02
Supplement: s1 [file s1]

**Table S1**

**Primer and probe sequences used for the quantitation of vector and transcript copy number**

| <b>Primers</b> | <b>Primers</b> | <b>Sequences 5'-3'</b>                |
|----------------|----------------|---------------------------------------|
| GAPDH          | Forward        | ACGGCAAATTCAACGGCAC                   |
|                | Reverse        | TAGTGGGGTCTCGCTCCTGG                  |
| IRES           | Forward        | CTAACGTTACTGGCCGAAGC                  |
|                | Reverse        | AGGAACTGCTTCCTTCACGA                  |
| Transposase    | Forward        | TGGGAAGAGGAACACAGACC                  |
|                | Reverse        | TTGTTTGATCGCACGGTTCC                  |
| INS-FUR        | Forward        | CAAGAGAGAGGCCGAGGAC                   |
|                | Reverse        | AGCTGGTACAGGCTGCAGAT                  |
| PDX1           | Forward        | GAACCCGAGGAAAACAAGAG                  |
|                | Reverse        | GACGGTTTTTGAACCAGAT                   |
| WPRE           | Forward        | CCGTTGTCAGGCAACGTG                    |
|                | Reverse        | AGCTGACAGGTGGTGGCAAT                  |
|                | Probe          | 5'-FAM-TGCTGACGCAACCCCCACTGGT-BHQ1-3' |
